# Supplementary material for: Gene-Based Testing of Interactions in Association Studies of Quantitative Traits
Source: PLoS Genet. 2013 Feb 28;9(2):e1003321. doi: 10.1371/journal.pgen.1003321 (PMC3585009; doi:10.1371/journal.pgen.1003321)
Supplement: Text S1 — Derivations of Equations (2) and (3). (DOC) [file pgen.1003321.s010.doc]

**Supporting Text S1**

**Derivation of Equation (2)**

Under the null hypothesis and with a relatively large sample size, *T*11 and *T*12 follow approximately a standard normal distribution. Thus,

**Derivation of Equation (3)**

As and in gene 1 are independent from and in gene 2,

Similarly,

Then,
